# Supplementary material for: Antimicrobial Drug Administration and Antimicrobial Resistance of Salmonella Isolates Originating from the Broiler Production Value Chain in Nigeria
Source: MDPI journal article supplement (doi:10.3390/antibiotics8020075), 2019-06-06
Supplement: s1 [file s1]

|    |   |   |   |   |    |    |    |    |    |    |    |    |    |   |    |   |
|----|---|---|---|---|----|----|----|----|----|----|----|----|----|---|----|---|
| -- | M | 1 | 4 | 6 | 11 | 15 | 23 | 67 | 83 | ++ | ++ | -- | -- | E | 89 | E |
|----|---|---|---|---|----|----|----|----|----|----|----|----|----|---|----|---|

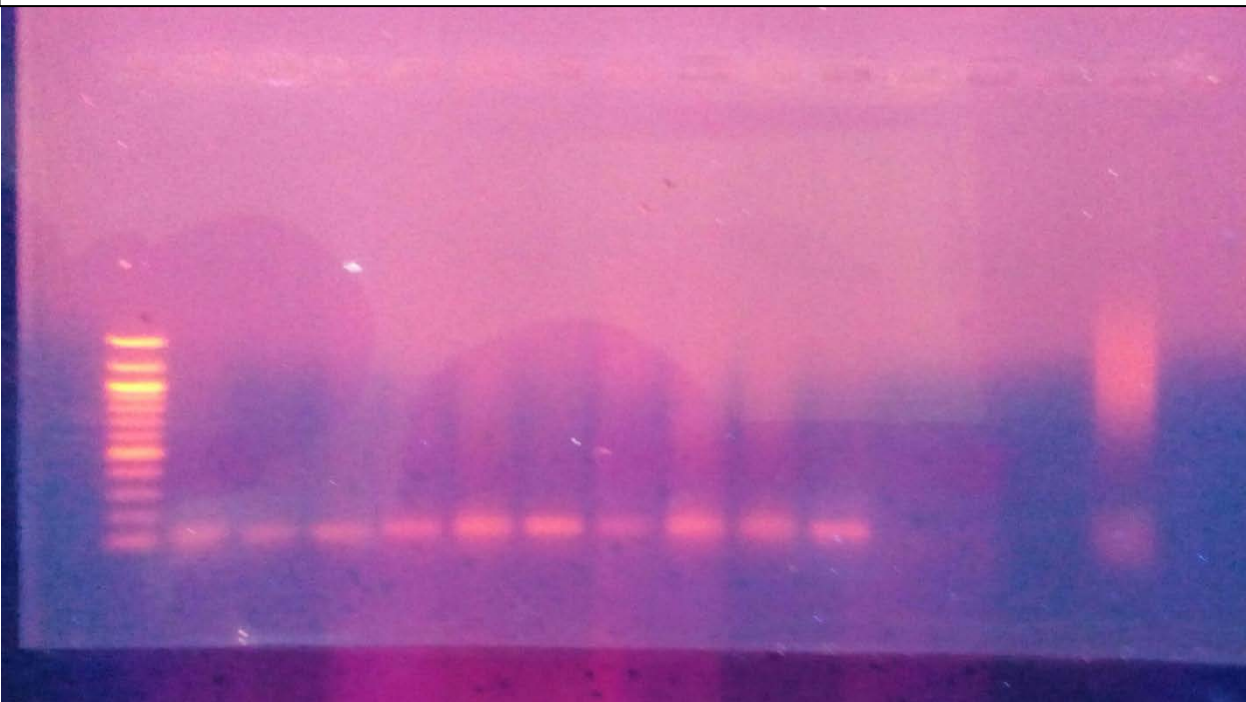

Note: -- = Negative.Control (No DNA). ++ =Positive control (Salmonella Typhimurium ATCC14028).  
E=Empty. 1, 4, 6, 11, 15, 23, 67, 83, 89 are biochemical confirmed Salmonella isolates. Expected bp= 119bp

**Figure S 2: Gel image of optimized *invA* gene PCR used for identification of *Salmonella* spp isolated from the Nigeria broiler production value chain**
