# Supplementary material for: Antimicrobial Drug Administration and Antimicrobial Resistance of Salmonella Isolates Originating from the Broiler Production Value Chain in Nigeria
Source: MDPI journal article supplement (doi:10.3390/antibiotics8020075), 2019-06-06
Supplement: s1 [file s1]

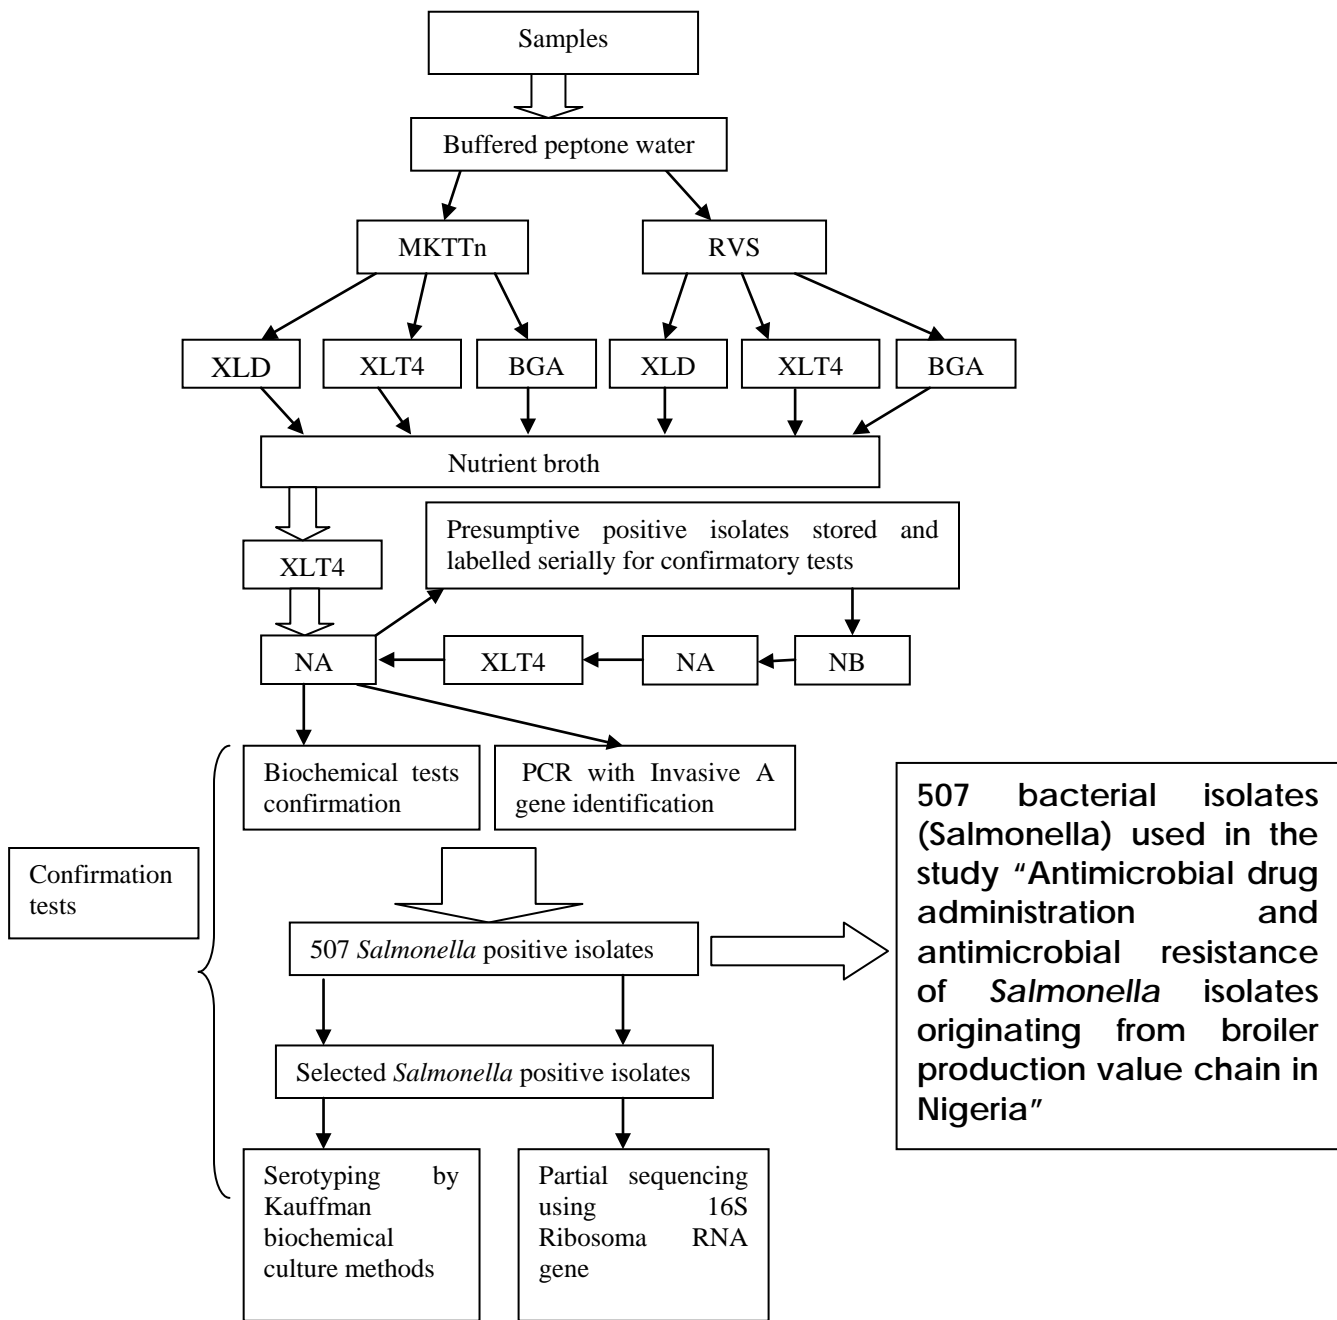

Note: MKTTn= Muller Kauffmann tetrathionate-novobiocin broth. RVS= Rappaport-Vassiliadis soya peptone broth. XLD= Xylose lysine deoxycholate agar. XLT4= Xylose lysine tergitol4. BGA= Brilliant green agar, NA= Nutrient agar. NB= Nutrient broth

**Figure S1: Flow chart of the methods involved in isolation and identification of *Salmonella* species along the broiler production value chain in Nigeria**
